# Supplementary material for: Synthesis and Characterisation of ASA-PEEK Composites for Fused Filament Fabrication
Source: MDPI journal article supplement (doi:10.3390/polym14030496), 2022-01-26
Supplement: s1 [file s1]

Supplementary Material

# Synthesis and Properties Assessment of ASA-PEEK Composites Suitable for Fused Filament Fabrication

## Synthesis and Characterisation of ASA-PEEK Composites for Fused Filament Fabrication

Belén Palacios-Ibáñez <sup>1,\*</sup>, José J. Relinque <sup>1,\*</sup>, Daniel Moreno-Sánchez <sup>1</sup>, Alberto S. de León <sup>1</sup>, Francisco J. Delgado <sup>1</sup>, Ramón Escobar-Galindo <sup>2</sup> and Sergio I. Molina <sup>1</sup>

<sup>1</sup> Departamento de Ciencia de los Materiales e I. M. y Q. I., IMEYMAT, Facultad de Ciencias, Campus Río San Pedro s/n, Universidad de Cádiz, 11510 Puerto Real, Spain; danielmoreno.sanchez@uca.es (D.M.-S.); alberto.sanzdeleon@uca.es (A.S.d.L.); fjavier.delgado@uca.es (F.J.D.); sergio.molina@uca.es (S.I.M.)

<sup>2</sup> Departamento de Física Aplicada, Escuela Politécnica Superior, Universidad de Sevilla, C/Virgen de África 7, 41011 Sevilla, Spain; rescobar1@us.es

\* Correspondence: belen.palacios@uca.es (B.P.-I.); josejavier.relinque@uca.es (J.J.R.); Tel.: +34-956-01-2028 (B.P.-I. & J.J.R.)

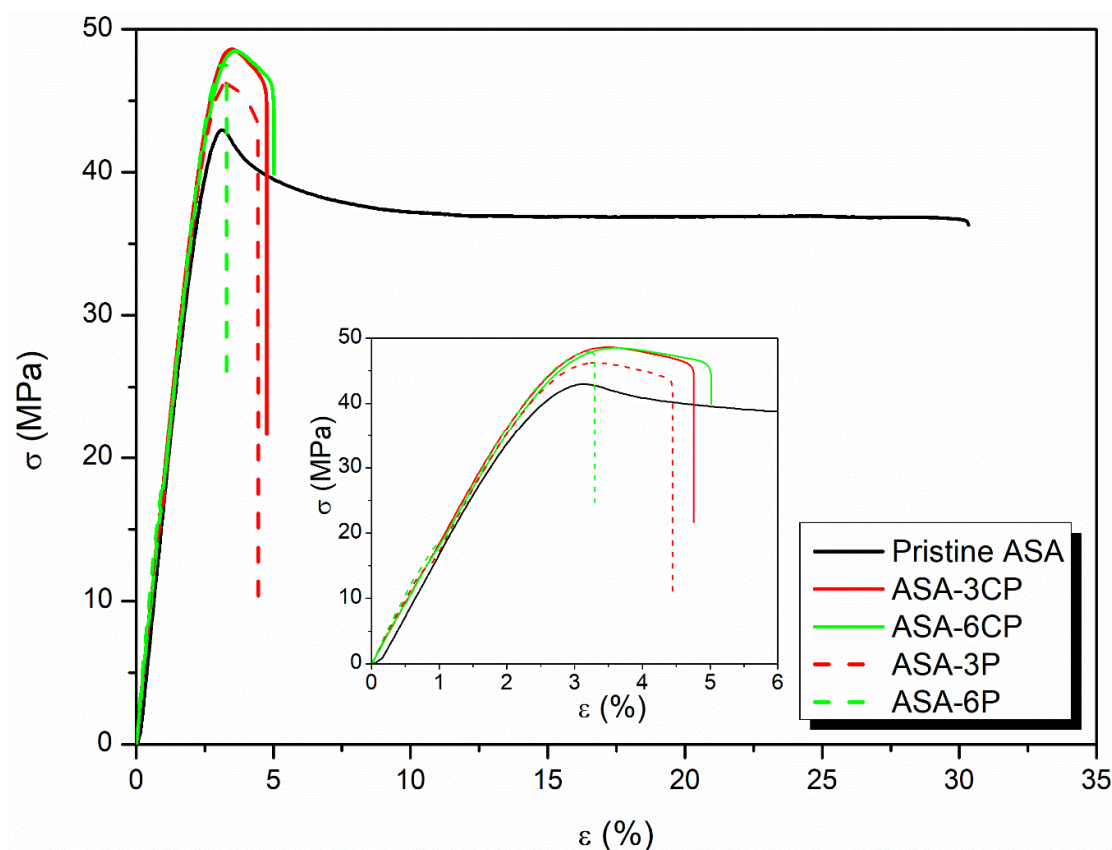

**Figure S1.** Stress-strain curves of pristine ASA, ASA-CP, and ASA-P composites prepared by IM

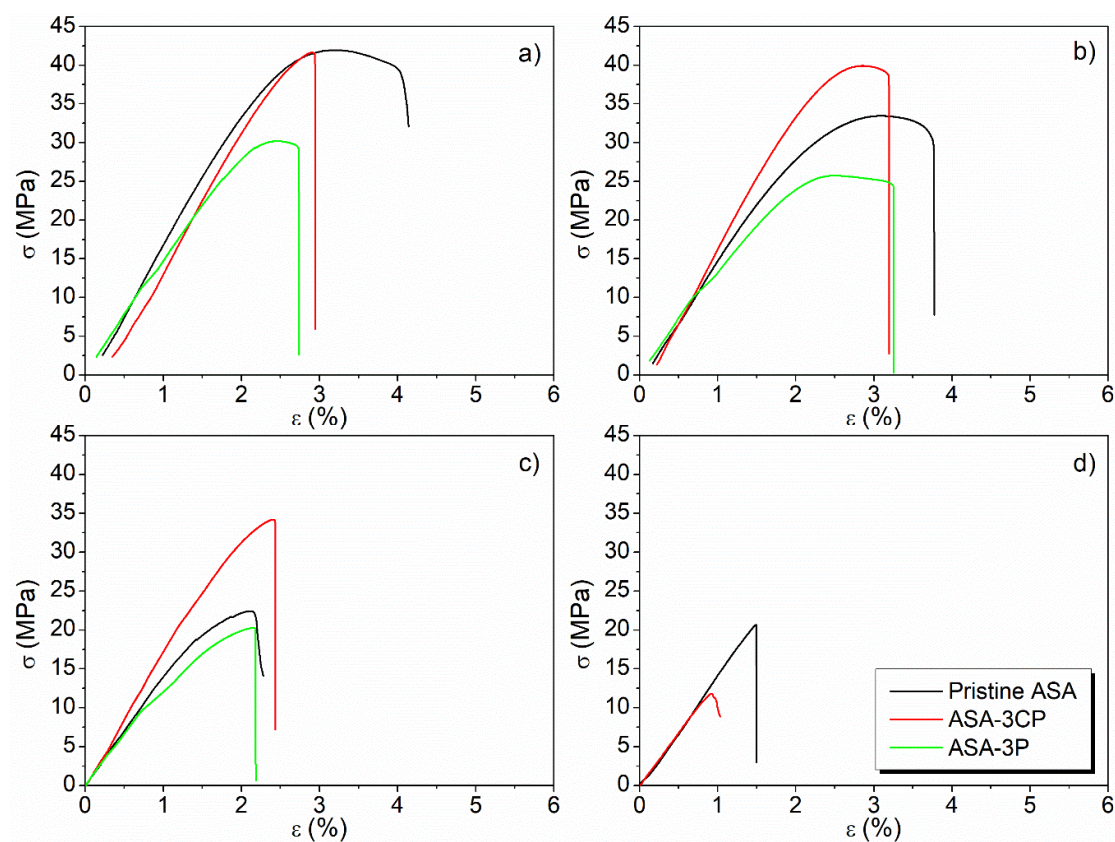

**Figure S2.** Stress-strain curves of pristine ASA, ASA-3CP, and ASA-3P composites prepared by FFF in the following orientations and raster angles (a) H-0; (b) H-45; (c) H-90, and (d) V-90.

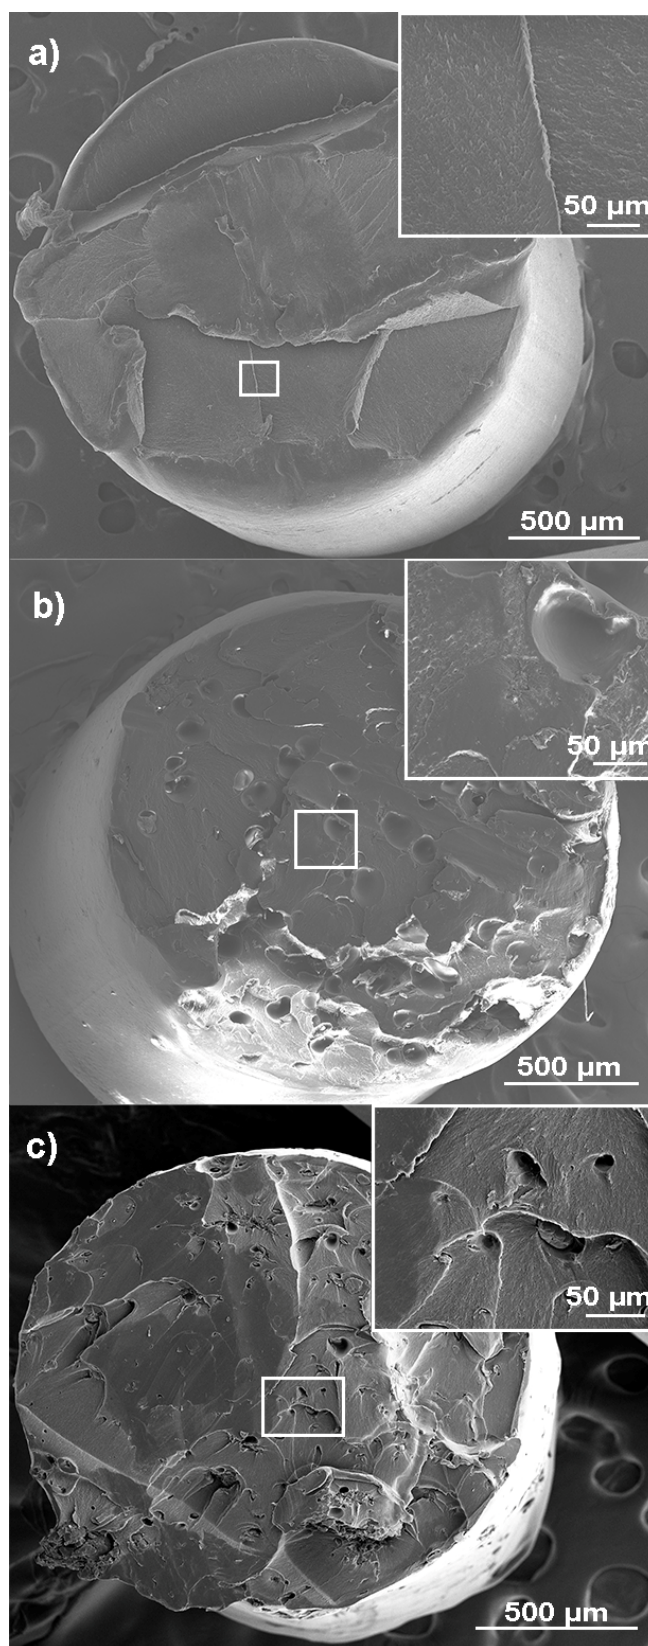

**Figure S3.** SEM images of filaments used to FFF print (a) pristine ASA; (b) ASA-3CP, and (c) ASA-3P, showing some porosity within the filaments of ASA-3CP and ASA-3P.
